# Supplementary material for: Regulatory Variant rs2535629 in ITIH3 Intron Confers Schizophrenia Risk By Regulating CTCF Binding and SFMBT1 Expression
Source: PubMed Central journal article supplement (PMC8867204; doi:10.1002/advs.202104786), 2022-01-02
Supplement: ADVS-9-2104786-s001.pdf [file ADVS-9-2104786-s001.pdf]

## Supporting Information

for *Adv. Sci.*, DOI: 10.1002/advs.202104786

Regulatory variant rs2535629 in *ITIH3* intron confers schizophrenia risk by regulating CTCF binding and *SFMBT1* expression

*Yifan Li, Changguo Ma, Shiwu Li, Junyang Wang, Wenqiang Li, Yongfeng Yang, Xiaoyan Li, Jiewei Liu, Jinfeng Yang, Yixing Liu, Kaiqin Li, Jiao Li, Di Huang, Rui Chen, Luxian Lv, Xiao Xiao, Ming Li, and Xiong-Jian Luo\**

## Supplementary material for

### Regulatory variant rs2535629 in *ITIH3* intron confers schizophrenia risk by regulating CTCF binding and *SFMBT1* expression

Yifan Li<sup>1,2,9</sup>, Changguo Ma<sup>1,6,9</sup>, Shiwu Li<sup>1,2,9</sup>, Junyang Wang<sup>1,2</sup>, Wenqiang Li<sup>3,4</sup>, Yongfeng Yang<sup>3,4</sup>, Xiaoyan Li<sup>1,5</sup>, Jiewei Liu<sup>1</sup>, Jinfeng Yang<sup>1,2</sup>, Yixing Liu<sup>1,2</sup>, Kaiqin Li<sup>1,2</sup>, Jiao Li<sup>1,2</sup>, Di Huang<sup>1</sup>, Rui Chen<sup>1,2</sup>, Luxian Lv<sup>3,4</sup>, Xiao Xiao<sup>1</sup>, Ming Li<sup>1</sup>, Xiong-Jian Luo<sup>1,2,7,8,\*</sup>

<sup>1</sup>Key Laboratory of Animal Models and Human Disease Mechanisms of the Chinese Academy of Sciences & Yunnan Province, Kunming Institute of Zoology, Chinese Academy of Sciences, Kunming, Yunnan 650204, China

<sup>2</sup>Kunming College of Life Science, University of Chinese Academy of Sciences, Kunming, Yunnan 650204, China

<sup>3</sup>Henan Mental Hospital, The Second Affiliated Hospital of Xinxiang Medical University, Xinxiang, Henan 453002, China;

<sup>4</sup>Henan Key Lab of Biological Psychiatry, International Joint Research Laboratory for Psychiatry and Neuroscience of Henan, Xinxiang Medical University, Xinxiang, Henan 453002, China

<sup>5</sup>Key Laboratory of Intelligent Computing and Signal Processing of Ministry of Education, Institutes of Physical Science and Information Technology, Anhui University, Hefei, Anhui 230601, China

<sup>6</sup>Yunnan Key Laboratory for Basic Research on Bone and Joint Diseases & Yunnan Stem Cell

Translational Research Center, Kunming University, Kunming, Yunnan 650214, China

<sup>7</sup>Center for Excellence in Animal Evolution and Genetics, Chinese Academy of Sciences,  
Kunming, Yunnan 650204, China

<sup>8</sup>KIZ-CUHK Joint Laboratory of Bioresources and Molecular Research in Common Diseases,  
Kunming Institute of Zoology, Chinese Academy of Sciences, Kunming, Yunnan 650204, China

<sup>9</sup>These authors contributed equally to this work

\*To whom correspondence should be addressed: Xiong-Jian Luo, Key Laboratory of Animal Models and Human Disease Mechanisms, Kunming Institute of Zoology, Chinese Academy of Sciences, Kunming, Yunnan 650204, China; Tel: +86-871-68125413, Fax: +86-871-68125413, E-mail: [luoxiongjian@mail.kiz.ac.cn](mailto:luoxiongjian@mail.kiz.ac.cn) (XJL).

**Detailed methods are provided in this paper and include the following:**

- **METHOD DETAILS**

*Genotyping*

*Cell culture*

*Schizophrenia cases and controls*

*Dual luciferase reporter gene assay*

*CRISPR-Cas9-mediated genome editing*

*Knockdown assays*

*Assays of dendritic spine density*

Detailed information about the reagents are provided in the **Supplementary Table 1**.

## **Supplementary Methods**

### *Genotyping*

In brief, the genomic sequence surrounding the rs2535629 was amplified by PCR with specific primers (**Supplementary Table 2**). The PCR products were then treated with shrimp alkaline phosphatase (SAP) and exoenzyme I (ExoI) to remove unincorporated dNTPs and primers. The purified products were used as template to genotype rs2535629 with snapshot multiple mixing solution, genotyping primers (**Supplementary Table 3**) and ddNTPs. Genotyping data were analyzed and manually checked using the GeneMapper software 4.0.

### *Cell culture*

HEK-293T and U251 cells were cultured in high-glucose Dulbecco's Modified Eagle's medium containing 10% FBS, 1× penicillin and streptomycin (contains 50 units/mL of penicillin and 50 µg/mL of streptomycin). SH-SY5Y and SK-N-SH was cultured in high-glucose DMEM supplemented with 10% FBS, 10 mM sodium pyruvate solution, 1× Minimum Essential Medium non-essential amino acid solution, penicillin and streptomycin. Cells were cultured at 37°C (with 5% CO<sub>2</sub>) and there were no mycoplasma contamination detected in our study (**Supplementary Table 4**).

### *Schizophrenia cases and controls*

All of cases were diagnosed with DSM-IV criteria, using the Structured Clinical Interview for DSM-IV (SCID)<sup>[1]</sup>. The detailed information about the onset of schizophrenia, the duration course, symptoms, family history of psychiatric illnesses and medical history were evaluated by at least two independent experienced psychiatrists to reach a consensus DSM-IV diagnosis. Subjects with a history of alcoholism, epilepsy, neurological disorders, or drug abuse were excluded from the study.

### ***Dual luciferase reporter gene assays***

The human DNA sequence containing rs2535629 was amplified with specific primers (**Supplementary Table 5**). The amplified products were digested with restriction enzymes KpnI and XhoI, then ligated into the pGL3-promoter vector. The ligated vectors were transfected into DH-5 $\alpha$  cells and selected with LB culture plates containing ampicillin. After screening for 18 hours, single colonies were selected for further amplification culture. The sequence of the inserted DNA was verified by Sanger sequencing. PCR-mediated point mutation technology was used to generate DNA fragments containing alternative alleles of SNP (**Supplementary Table 5**).

Luciferase reporter gene assays were performed in HEK-293T, SH-SY5Y, SKN-SH and U251 cells. For HEK-293T cells,  $4 \times 10^4$  cells were seeded into 96-well plates. After culturing for 24 hours, the recombinant plasmid (100 ng) and the internal control plasmid pRL-TK (Renilla Luciferase) (20 ng) were co-transfected into the cells using Lipofectamine 3000. For SK-N-SH and SH-SY5Y, and U251 cells,  $6 \times 10^4$  cells were plated into a 96-well plate. After 24 hours culture, the recombinant plasmid (150 ng) and the internal control plasmid pRL-TK (50 ng) were co-transfected into the cells using Lipofectamine 3000. 48 hours post transfection, luciferase activity was determined by using Luminoskan Ascent instrument (Thermo Scientific) and the dual-luciferase reporter gene detection system. The testing process is carried out in accordance with the manufacturer's recommended instructions.

### ***CRISPR-Cas9-mediated genome editing***

To knockout the genomic sequence containing rs2535629, we designed two sgRNAs (located in upstream and downstream of rs2535629, respectively) and cloned the sgRNAs into PX-459 vector. SH-SY5Y cells were seeded into a 6-well plate with a density of  $1 \times 10^6$ /well. After culturing for 24 hours, these cells were transfected with the constructed plasmids using Lipo3000. Puromycin (1  $\mu$ g/ml) was used to select the transfected cells. Genomic DNA was extracted by phenol/chloroform method and the extracted DNA was used as the template for knockout efficiency validation. RNA was extracted by TRIZOL reagent. Takara reverse transcription kit was used for reverse transcription, according to the manufacturer's instructions. Gene expression was quantified using SYBR kit.

### ***Knockdown assays***

The synthesized shRNAs were annealed and ligated into the pLKO.1-EGFP-Puro vector. The lentiviruses were packed with HEK-293T cells cultured in 10 cm culture dish. The constructed shRNA plasmids and the package plasmids were co-transfected into HEK-293T cells when confluence reached about 70%. After culturing for 48 hours, lentiviruses were collected and used to infect the cells. 48 hours post infection, 2 µg puromycin was added to each well for 7 days to kill the uninfected cells. TRIZOL was used to extract total RNA and reverse transcription was conducted using the Takara reverse transcription kit. Gene expression was quantified using the SYBR kit.

### ***Assays of dendritic spine density***

Two softwares (ImageJ software<sup>[2]</sup> (<https://imagej.nih.gov/ij/>), NeuronStudio<sup>[3]</sup> ([https://m.vk.com/neuron\\_studio](https://m.vk.com/neuron_studio))) were jointly used for neuron morphological analysis. Briefly, the neurons that co-labeled with green (Venus protein which used to manifest spine morphology of neurons) and red (mCherry indicated that the knock-down vectors were transfected into the target neuron) fluorescence were selected for morphological analysis with double-blind. Image J software was used to transform the format of target picture (.czi) produced by Laser confocal instrument (ZEISS) into other format (.tiff) with 8-bit (which can be opened with NeuronStudio software). The NeuronStudio (a toolkit for neurite spine analysis) was then used to trace the second and tertiary dendrite ((total length of 100 µm per neuron)) of target neurons and identify spine types automatically. The derived spine types were confirmed by manual correction according to the 3D structure of neurons and the specific criterion of spines (mushroom: head to neck diameter ratio > 1.5, stubby: head to neck diameter ratio < 1.5 and length to neck diameter ratio < 2, thin: head to neck diameter ratio < 1.5 and length to neck diameter ratio > 2)<sup>[4, 5]</sup>.

### **Supplementary Table 1**

| <b>REAGENT or RESOURCE</b> | <b>SOURCE</b> | <b>IDENTIFIER</b> |
|----------------------------|---------------|-------------------|
| <b>Antibody</b>            |               |                   |

|                                                      |                           |                  |
|------------------------------------------------------|---------------------------|------------------|
| Anti-MAP2                                            | Merck millipore           | Cat# AB5622      |
| Anti-GFAP                                            | Abcam                     | Cat# ab10062     |
| CTCF (D31H2) XP® Rabbit mAb                          | Cell Signaling Technology | Cat# 3418        |
| Donkey anti-rabbit 488                               | Invitrogen                | Cat# A32790      |
| Donkey anti-mouse 555                                | Invitrogen                | Cat# A32773      |
| Donkey anti-goat 647                                 | Invitrogen                | Cat# A32849      |
| Donkey Anti-Chicken                                  | Jackson                   | Cat# 703-225-155 |
| Anti-SOX2                                            | Santa cruz                | Cat# sc-17320    |
| Anti-NESTIN                                          | Merck                     | Cat# MAB353      |
| Anti-PAX6                                            | Merck                     | Cat# ab2237      |
| Chicken polyclonal GFP antibody                      | Abcam                     | Cat# ab13970     |
| Rabbit anti-mCherry antibody                         | Gene Tex                  | Cat# GTX128508   |
| Bromodeoxyuridine                                    | Novus                     | Cat# NE500-169   |
| <b>Bacterial and Virus Strains</b>                   |                           |                  |
| DH5 $\alpha$ Chemically Competent cells              | Tsingke                   | Cat# TSV-A07     |
| Stbl3 Chemically Competent cells                     | Tsingke                   | Cat# TSC06       |
| <b>Chemicals, Peptides, and Recombinant Proteins</b> |                           |                  |
| High-glucose DMEM                                    | Gibco                     | Cat# C11995500BT |
| High-glucose DMEM                                    | Gibco                     | Cat# C12430500BT |
| DMEM/F-12 medium(mouse NSCs)                         | Gibco                     | Cat# 11320033    |
| Fetal Bovine Serum(FBS)                              | Gibco                     | Cat# 10091148    |
| Penicillin/Streptavidin                              | Gibco                     | Cat# 15070063    |
| Non-essential amino acids                            | Gibco                     | Cat# 11140050    |
| Sodium pyruvate solution                             | Gibco                     | Cat# 11360070    |
| B-27™ Supplement (50X), minus                        | Gibco                     | Cat# 12587010    |
| B-27™ Supplement (50X), serum free                   | Gibco                     | Cat# 17504044    |
| N2                                                   | Gibco                     | Cat# 17502048    |
| Neurobasal® Medium                                   | Gibco                     | Cat# 21103049    |
| Glutmax                                              | Gibco                     | Cat# 35050061    |
| Laminin                                              | Sigma                     | Cat# L2020       |
| Poly-D-lysine hydrobromide                           | SIGMA                     | Cat# P6407       |
| HBSS                                                 | ThermoFisher              | Cat# 14175079    |
| HEPES                                                | Solarbio                  | Cat# H8090       |
| Epidermal Growth Factor(EGF)                         | STEMCELL                  | Cat# 78006       |
| Basic Fibroblast growth factor(bFGF)                 | STEMCELL                  | Cat# 78003       |
| heparin                                              | STEMCELL                  | Cat# 7980        |
| SoSoo Mix                                            | TSINGKE                   | Cat# TSV-S1      |

|                                        |                           |                                                                                             |
|----------------------------------------|---------------------------|---------------------------------------------------------------------------------------------|
| Lipofectamine 3000                     | Thermo Fisher Scientific  | Cat# L3000015                                                                               |
| Lenti-X Concentrator                   | Takara                    | Cat# 631232                                                                                 |
| TRIzol™ LS Reagent                     | ThermoFisher              | Cat# 15596018                                                                               |
| TB Green™ Premix Ex Taq™ II            | Takara                    | Cat# RR820A                                                                                 |
| XhoI                                   | FastDigest                | Cat# FD0694                                                                                 |
| KpnI                                   | FastDigest                | Cat# FD0524                                                                                 |
| DAPI                                   | Beyotime                  | Cat# C1002                                                                                  |
| SimpleChIP® qPCR mix                   | Cell Signaling Technology | Cat# 88989                                                                                  |
| <b>Critical Commercial Assays</b>      |                           |                                                                                             |
| PrimeScript™ RT reagent Kit with gDNA  | Takara                    | Cat# RR047A                                                                                 |
| Enhanced Cell Counting Kit-8           | Beyotime                  | Cat# C0042                                                                                  |
| SimpleChIP® Enzymatic Chromatin IP     | Cell Signaling Technology | Cat# 9003S                                                                                  |
| Dual-Luciferase® Reporter Assay System | Promega                   | Cat# E1980                                                                                  |
| <b>Experimental Models: Cell Lines</b> |                           |                                                                                             |
| HEK-293T                               | ATCC                      | Cat# CRL-11268                                                                              |
| SH-SY5Y                                | ATCC                      | Cat# CRL-2266                                                                               |
| SK-N-SH                                | ATCC                      | Cat# HTB-11                                                                                 |
| U251                                   | ATCC                      | Cat# 300385/p534                                                                            |
| mNSCs                                  | This paper                | N/A                                                                                         |
| neuron                                 | This paper                | N/A                                                                                         |
| <b>vectors</b>                         |                           |                                                                                             |
| pLKO.1-EGFP-Puro vector                | qincheng BIO              | Cat# QCP1717                                                                                |
| pSicoR-Ef1a-mCh-Puro                   | Addgene                   | Cat# 31845                                                                                  |
| PX-459                                 | Feng Zhang Lab at MIT     | N/A                                                                                         |
| pRL-TK                                 | Promega                   | Cat# E2241                                                                                  |
| pGL3-promoter                          | Promega                   | Cat# E1761                                                                                  |
| pMD2.G                                 | Addgene                   | Cat# 12259                                                                                  |
| pSPAX2                                 | Addgene                   | Cat# 12260                                                                                  |
| <b>Software</b>                        |                           |                                                                                             |
| The 3D-genome Interaction Viewer and   | Yang et al., 2018         | <a href="https://www.kobic.kr/3div/">https://www.kobic.kr/3div/</a>                         |
| CRISPR sgRNA design tool               | Feng Zhang Lab at MIT     | <a href="https://zlab.bio/guide-design-resource">https://zlab.bio/guide-design-resource</a> |
| Knockdown assay-shRNAs design tool     | ThermoFisher              | <a href="https://rnaidesigner.thermofisher.com/">https://rnaidesigner.thermofisher.com/</a> |
| PLINK (v1.09)                          | Purcell et al., 2007      | N/A                                                                                         |
| GeneMapper software 4.0                | ThermoFisher              | N/A                                                                                         |
| ImageJ                                 | NIH                       | <a href="https://imagej.nih.gov/ij/">https://imagej.nih.gov/ij/</a>                         |
| NeuronStudio                           | Rodriguez et al., 2006    | <a href="https://m.vk.com/neuron_studio">https://m.vk.com/neuron_studio</a>                 |



**Supplementary Table 2. PCR primers used to amplify the genomic sequence containing the rs2535629 (for genotyping assay)**

| Primer(5'>3')      | rs2535629            |
|--------------------|----------------------|
| rs2535629-F(287bp) | TAGACCAACAGCGTTCATGC |
| rs2535629-R(287bp) | GAAAAAGACGTTCTATCCCA |

**Supplementary Table 3. SNaPSHOT primer used to genotype rs2535629**

| Primer (5'>3') | rs2535629                                                                      |
|----------------|--------------------------------------------------------------------------------|
| Ex-rs2535629   | TTTTTTTTTTTTTTTTTTTTTTTTTTTTTTTTTTTTTTTTTTTTTTTTTTTTTTTTTTTCAGCCCAAGGCTGTTTTCT |

**Supplementary Table 4. PCR primers for detection of mycoplasma contamination**

| PCR primer (5'>3') | Mycoplasma primer        |
|--------------------|--------------------------|
| F (Forward)        | GCATTGGAAACTGTTAGTCTGGAG |
| R (Reverse)        | ATTCCGTTTGAGTTTCATTCTTGC |

**Supplementary Table 5. PCR primers used for amplification of DNA sequence containing rs2535629 (for reporter gene assay)**

| PCR primer (5'>3')  | rs2535629                                        |
|---------------------|--------------------------------------------------|
| rs2535629-F         | CCAGAACATTTCTCTATCGATAGGTACCGCCAGCTTAGACCAACAGCG |
| rs2535629-R         | GATGCAGATCGCAGATCTCGAGGCCACGTTCTTAGGCACCACT      |
| rs2535629-F-Mut-G>A | CCTACAGGATGTGGGACAGCTG                           |
| rs2535629-R-Mut-G>A | CTGTAGGAAAACAGCCTTGGGC                           |

**Supplementary Table 6. ChIP-qPCR primer used for CTCF enrichment analysis**

| ChIP-qPCR primer (5'>3') | rs2535629             |
|--------------------------|-----------------------|
| rs2535629-enrichment-F   | CTGGATCTAGTGCCATCACCC |
| rs2535629-enrichment-R   | GCTCTAGGCCATCAGCTGTC  |
| rs2535629-AS-qPCR-F-G    | GCCCAAGGCTGTTTTCCAG   |

|                       |                      |
|-----------------------|----------------------|
| rs2535629-AS-qPCR-F-A | GCCCAAGGCTGTTTTCCAA  |
| rs2535629-AS-qPCR-R   | AGAAGCCAGACATTTACCAG |

**Supplementary Table 7. sgRNA primers used to knockout DNA fragments containing rs2535629**

| CRISPR-Cas9-knockout-sgRNA (5'>3') |                       |
|------------------------------------|-----------------------|
| rs2535629-sgRNA-up-F               | ACATGAACGAGGCCAAGCGG  |
| rs2535629-sgRNA-up-R               | CCGCTTGGCCTCGTTCATGTc |
| rs2535629-sgRNA-down-F             | ACGGACACTACCAAGGAGC   |
| rs2535629-sgRNA-down-R             | GCTCCTTGGTAGTGTCCGTc  |
| rs2535629-knockout-F               | AAGCCCAGCTTAGACCAACAG |
| rs2535629-knockout-R               | TGTGCCACTGGTGCTGATTA  |

**Supplementary Table 8. Sequences of shRNAs used to knockdown CTCF and *Sfmbt1***

| Knockdown-shRNA-primer (5'>3') |                       |
|--------------------------------|-----------------------|
| CTCF-human-shRNA-1             | GCAAGACATGCTGATAATTGT |
| CTCF-human-shRNA-2             | GCGAAAGCAGCATTCCATAT  |
| <i>Sfmbt1</i> -mouse-shRNA-1   | GACCATAACAAGGCGATCAT  |
| <i>Sfmbt1</i> -mouse-shRNA-2   | GCAAGTTATTGGAACCCAT   |
| <i>Sfmbt1</i> -rat-shRNA-1     | GCTGCAGTATGAAGGACTT   |
| <i>Sfmbt1</i> -rat-shRNA-2     | GCAGTGGAGTCTAAAGAAT   |

**Supplementary Table 9. PCR primers for qPCR**

| qPCR-primer (5'>3')          |                        |
|------------------------------|------------------------|
| ACTIN-F                      | CATGTACGTTGCTATCCAGGC  |
| ACTIN-R                      | CTCCTTAATGTCACGCACGAT  |
| GAPDH-F                      | TTCCTACCCCAATGTATCCG   |
| GAPDH-R                      | CATGAGGTCCACCACCTGTT   |
| CTCF-human-qPCR-F:           | TCAGTGCAGTTTGTGCAGTTA  |
| CTCF-human-qPCR-R:           | TTCCCCTGAATGGGTTCTCAT  |
| <i>GLT8D1</i> -human-qPCR-F: | AAATGCTCTCCGACATGCAGT  |
| <i>GLT8D1</i> -human-qPCR-R: | TTGGAGCGAGTGTGTGCTG    |
| <i>NEK4</i> -human-qPCR-F:   | ACATCATCAAAGTAGGGGACCT |

|                              |                        |
|------------------------------|------------------------|
| <i>NEK4</i> -human-qPCR-R:   | CAGGGCTCATGTAGTAGGGTG  |
| <i>SFMBT1</i> -human-qPCR-F: | GGCTCTGGTATGGAAGAGGTA  |
| <i>SFMBT1</i> -human-qPCR-R: | TCTCAGGATCTGTTCTCACAGC |
| <i>Sfmbt1</i> -mouse-qPCR-F: | TCCACCACAGTTCCTACG     |
| <i>Sfmbt1</i> -mouse-qPCR-R: | AACCCAATAAGTCTCAGGGTCA |
| <i>Sfmbt1</i> -rat-qPCR-F:   | GGTCTCCTTTTGGGATTCT    |
| <i>Sfmbt1</i> -rat-qPCR-R:   | GAGGAGGGTTGATGTGTA     |
| <i>Map2</i> -mouse-qPCR -F   | GCCAGCCTCGGAACAAACA    |
| <i>Map2</i> -mouse-qPCR -R   | GCTCAGCGAATGAGGAAGGA   |
| <i>Gfap</i> -mouse-qPCR -F   | CGGAGACGCATCACCTCTG    |
| <i>Gfap</i> -mouse-qPCR -R   | AGGGAGTGGAGGAGTCATTCG  |
| <i>Tuj1</i> -mouse-qPCR F    | TAGACCCCAGCGGCAACTAT   |
| <i>Tuj1</i> -mouse-qPCR -R   | GTTCCAGGTTCCAAGTCCACC  |

---

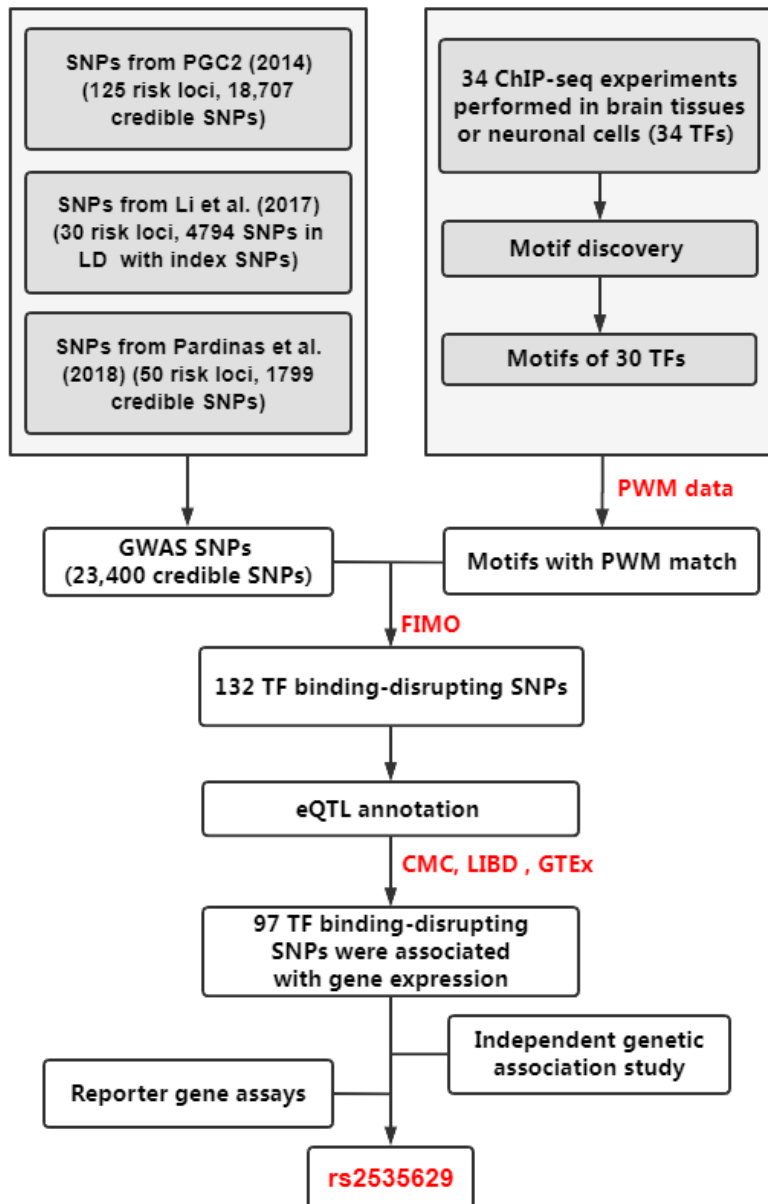

**Supplementary Figure 1. Prioritization and identification of regulatory SNPs at schizophrenia risk loci.** Risk SNPs from three large-scale GWASs<sup>[6-8]</sup> were subjected to functional genomics analyses. Chromatin immunoprecipitation and sequencing (ChIP-Seq) experiments performed in brain tissues or neuronal cell lines (such as neuroblastoma) were used to derive the binding motifs (i.e., specific DNA sequence) of corresponding transcription factors. The identified PWMs were then compared to the PWM database, and the matched PWMs (i.e., PWMs derived from ChIP-Seq were compared with the corresponding PWMS in PWM database, and the one with best motif match was used for further analysis) were used to investigate if the risk SNPs were located in the identified PWMs and if different alleles of the SNPs disrupted (or affected) the binding of transcription factor. Expression quantitative trait loci (eQTL) annotation was performed to explore the potential target genes of the identified regulatory SNPs. Reporter gene assays were used to validate the regulatory effects of the identified TF binding-disrupting SNPs, and independent genetic association study was conducted to validate if the identified TF binding-disrupting SNPs were associated with schizophrenia in Chinese population.

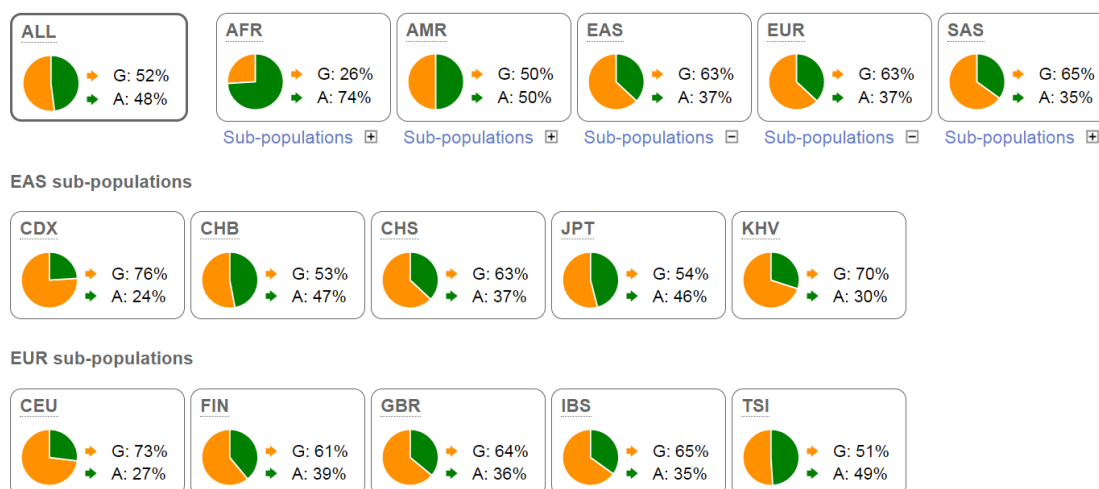

**Supplementary Figure 2. Allelic frequency of rs2535629 in differently populations.** Upper panel: AFR: African, AMR: American, EAS: East Asian, EUR: South Asian. Middle panel: CDX: Chinese Dai in Xishuangbanna, CHB: Han Chinese in Beijing, CHS: Southern Han Chinese, JPT: Japanese in Tokyo, KHV: Kinh in Ho Chi Minh City. Bottom panel: CEU: Utah residents with Northern and Western European ancestry, FIN: Finnish in Finland, GBR: British in England and Scotland, IBS: Iberian populations in Spain, TSI: Toscani in Italy. Data were from the Ensembl website

([http://asia.ensembl.org/Homo\\_sapiens/Variation/Population?db=core;r=3:52798703-52799703;v=rs2535629;vdb=variation;vf=91992884#population\\_freq\\_EUR](http://asia.ensembl.org/Homo_sapiens/Variation/Population?db=core;r=3:52798703-52799703;v=rs2535629;vdb=variation;vf=91992884#population_freq_EUR)).

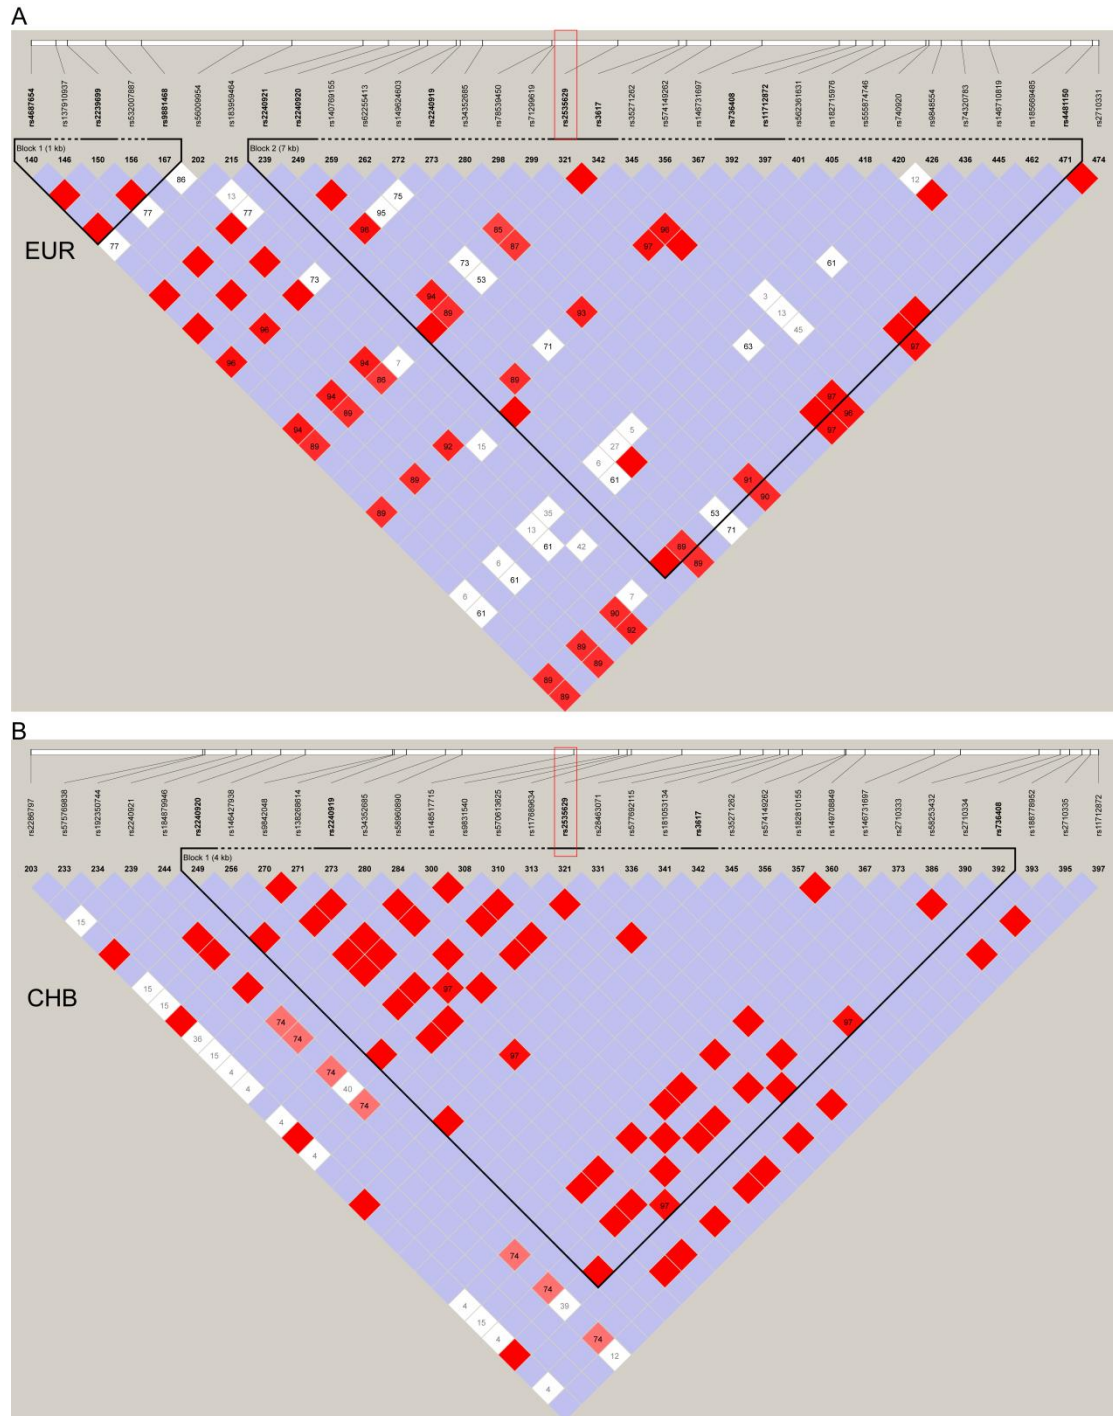

**Supplementary Figure 3. LD pattern of the genomic region surrounding rs2535629 in Europeans and East Asians. (genotype data were from the 1000 Genomes project).**

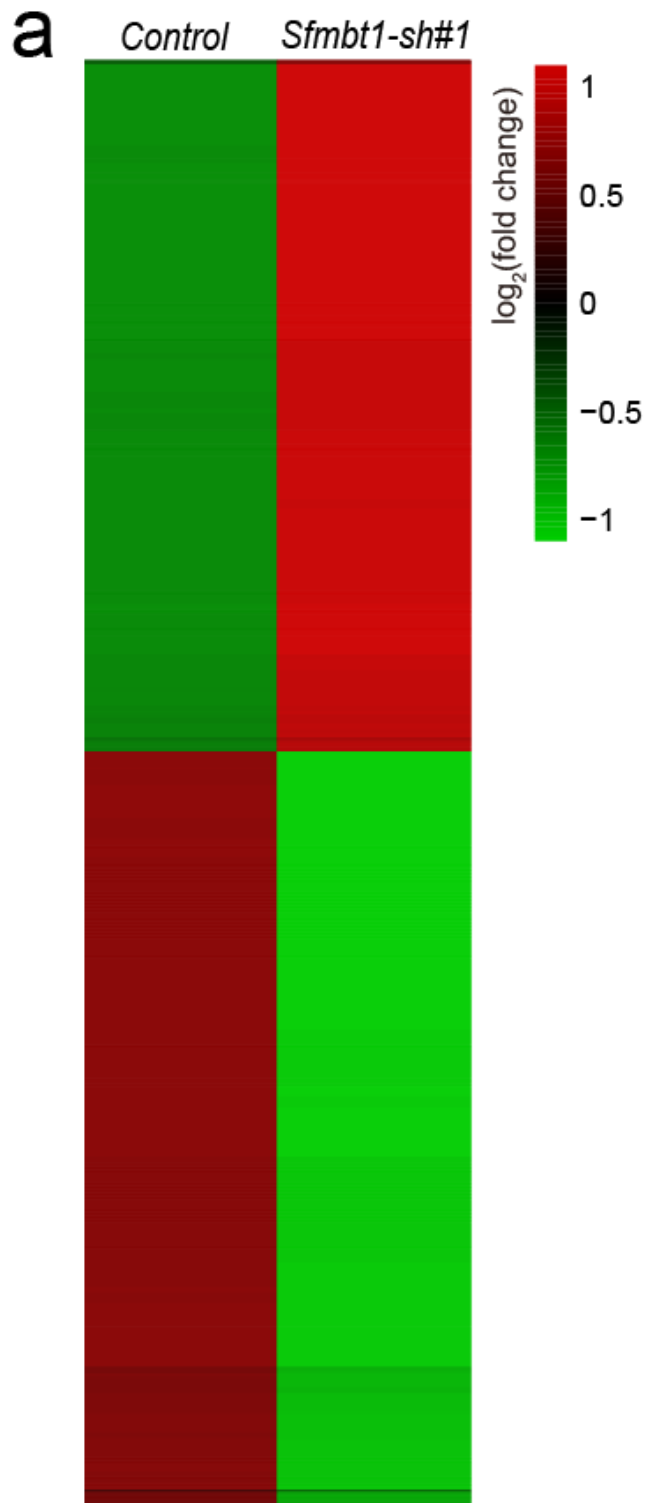

Supplementary Figure 4. Expression heatmap showed the differentially expressed genes (n=3,092,  $P_{adj}<0.01$ ,  $|\text{Log}_2(\text{fold change})|<0.5$ ) detected in *Sfmt1* knocked-down cells (compared with controls).

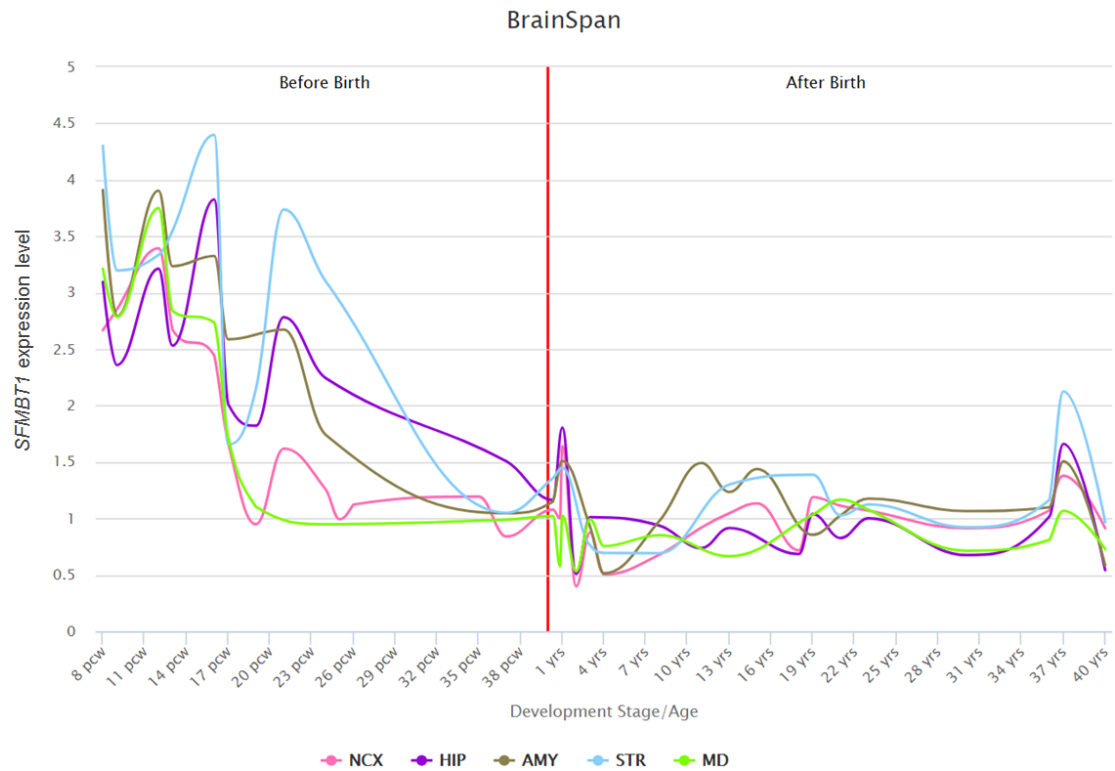

**Supplementary Figure 5. Spatio-temporal expression pattern analysis of *SFMBT1* in the developing (prenatal stages) and adulthood brains.** *SFMBT1* expression level across different developmental stages (from 8 post-conception weeks (pcw) to 40 years (yrs)) were plotted in five regions (NCX: neocortex, HIP: hippocampus, AMY: amygdaloid complex, STR: striatum and MD: mediodorsal nucleus of thalamus) of the human brain. Data were from the BrainSpan (<http://www.brainspan.org/>)<sup>[9]</sup>.



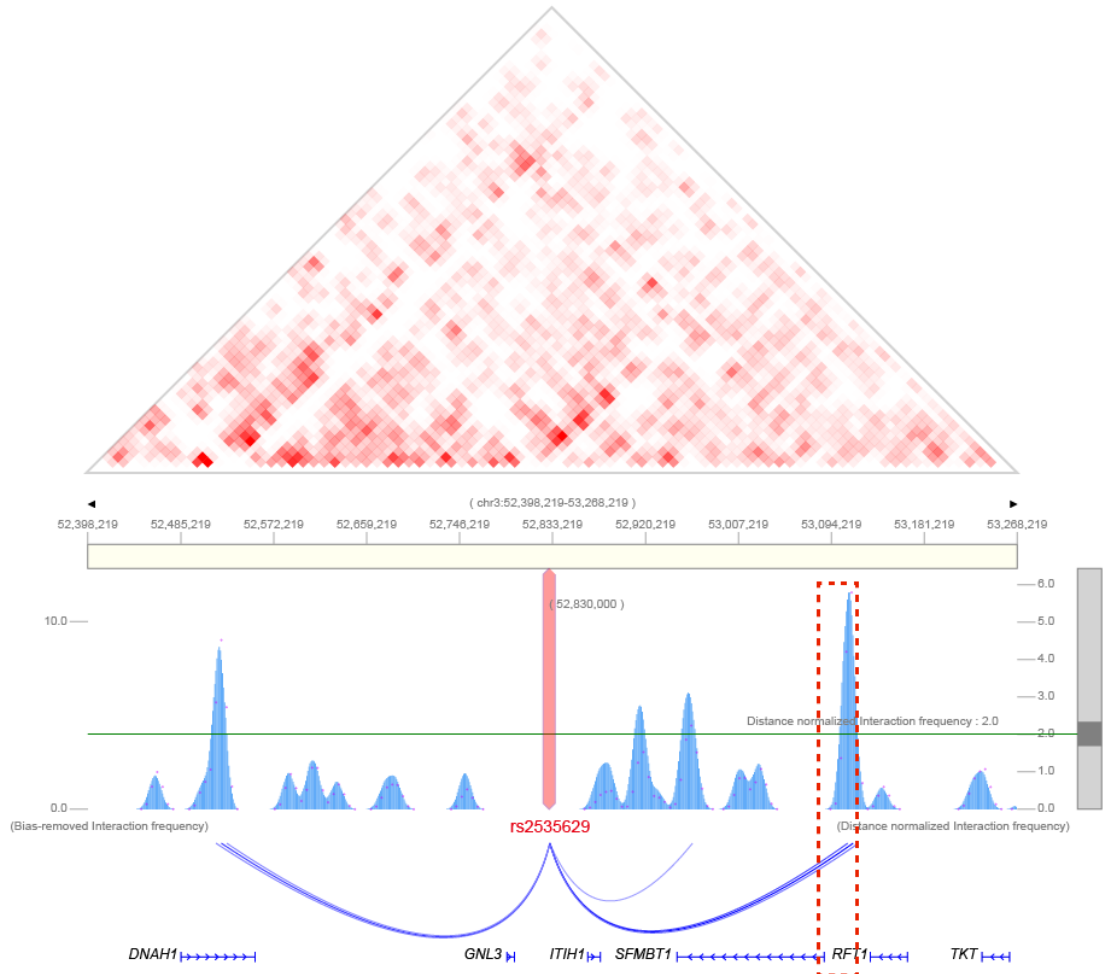

**Supplementary Figure 6. rs2535629 was physically interacted with *SFMBT1* (including the promoter regions) in the human dorsolateral prefrontal cortex.**

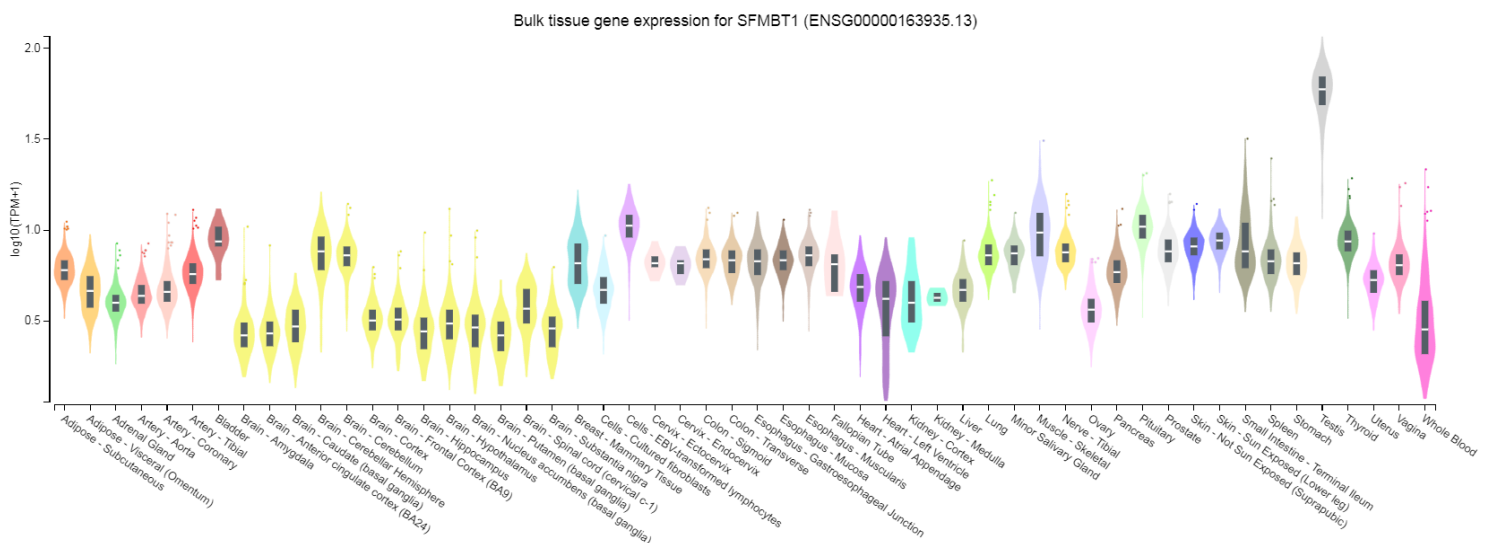

**Supplementary Figure 7. *SFMBT1* in different human tissues.** Data were from the GTEx website (<https://www.gtexportal.org/>).

## Consensus Human brain dataset<sup>i</sup>

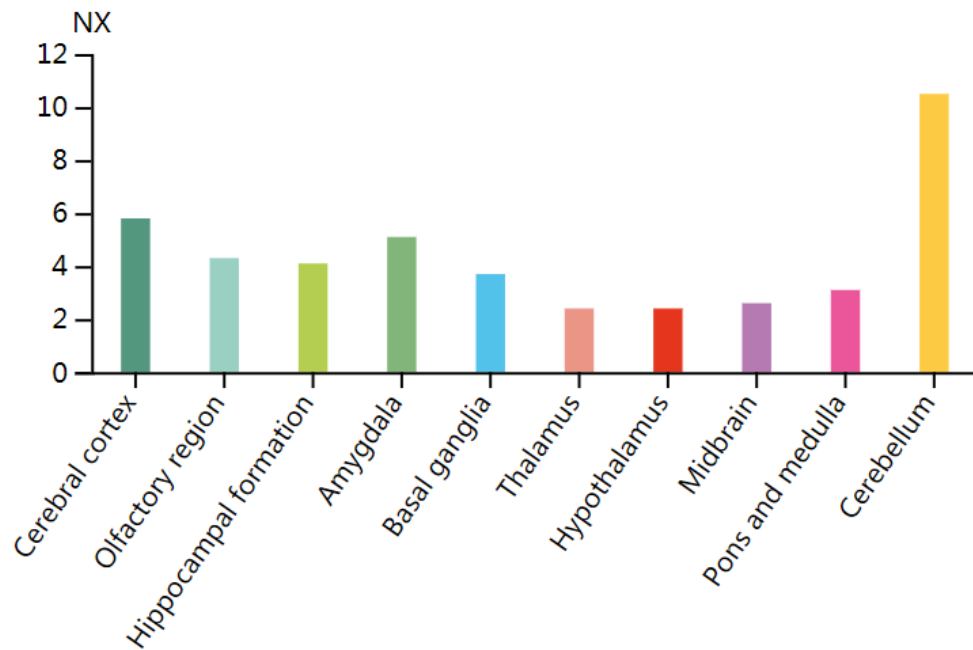

**Supplementary Figure 8. *SFMBT1* is widely expressed in the brain.** Consensus normalized expression (NX) levels were created for the 10 brain regions by combining the data from two transcriptomics datasets (GTEx and FANTOM5). Color coding is based on brain region and the bar shows the highest expression among the subregions included.

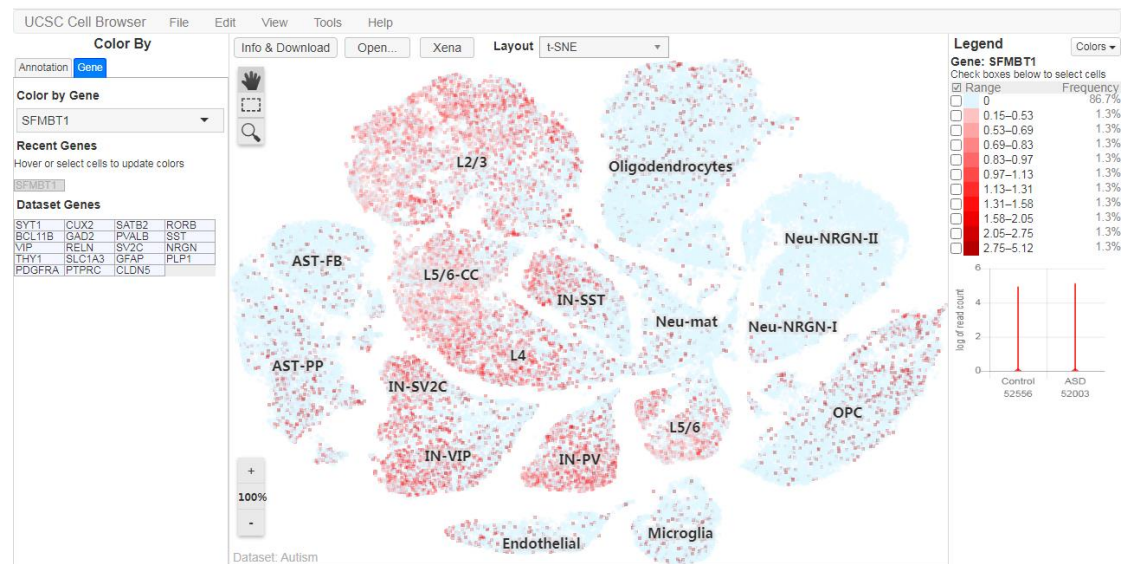

**Supplementary Figure 9. Cell-type-specific expression analysis showed that *SFMBT1* expression is relatively high in L2/3 (upper-layer excitatory neurons), L5/6 (deep-layer cortico-cortical excitatory projection neurons), VIP interneurons and parvalbumin interneurons.** Data was from the UCSC Cell Browser (<https://cells.ucsc.edu/?ds=autism&gene=SFMBT1#>).

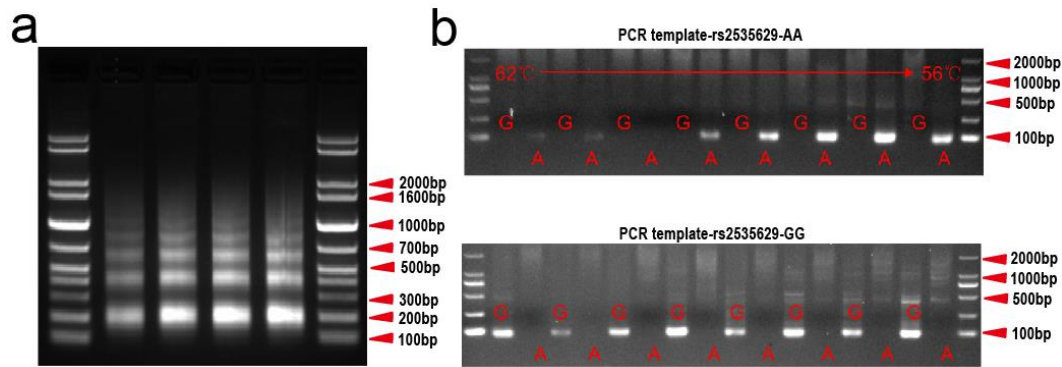

**Supplementary Figure 10. Electrophoresis of ChIP samples and primers used for ChIP-AS-qPCR (a) Micrococcal nuclease cleavage of DNA samples into 150-900 bp fragments. (b) Primer specificity and temperature gradient assays for ChIP-AS-qPCR.**

## References

- [1] B.S. Runeson, C.L. Rich, *Ann Clin Psychiatry*. **1994**, 6, 181-183.
- [2] M.Y. Li, W.Y. Miao, Q.Z. Wu, S.J. He, G. Yan, Y. Yang, J.J. Liu, M.M. Taketo, X. Yu, *Neuron*. **2017**, 94, 1155-1172.e1158.
- [3] A. Rodriguez, D.B. Ehlenberger, P.R. Hof, S.L. Wearne, *Nat Protoc*. **2006**, 1, 2152-2161.
- [4] D.P. Srivastava, K.M. Woolfrey, P.J.J.o.V.E. Penzes. **2011**. (53):e2794. Doi: 10.3791/2794.
- [5] M. Zagrebelsky, A. Holz, G. Dechant, Y.-A. Barde, T. Bonhoeffer, M. Korte, *The Journal of Neuroscience*. **2005**, 25, 9989.
- [6] Z.Q. Li, J.H. Chen, H. Yu, L. He, Y.F. Xu, D. Zhang, Q. Yi, C. Li, X. Li, J. Shen, Z. Song, W. Ji, M. Wang, J. Zhou, B. Chen, Y. Liu, J. Wang, P. Wang, P. Yang, Q. Wang, G. Feng, B. Liu, W. Sun, B. Li, G. He, W. Li, C. Wan, Q. Xu, W. Li, Z. Wen, K. Liu, F. Huang, J. Ji, S. Ripke, W. Yue, P.F. Sullivan, M.C. O'Donovan, Y. Shi, *Nat Genet*. **2017**, 49, 1576-1583.
- [7] A.F. Pardinas, P. Holmans, A.J. Pocklington, V. Escott-Price, S. Ripke, N. Carrera, S.E. Legge, S. Bishop, D. Cameron, M.L. Hamshere, J. Han, L. Hubbard, A. Lynham, K. Mantripragada, E. Rees, J.H. MacCabe, S.A. McCarroll, B.T. Baune, G. Breen, E.M. Byrne, U. Dannlowksi, T.C. Eley, C. Hayward, N.G. Martin, A.M. McIntosh, R. Plomin, D.J. Porteous, N.R. Wray, A. Caballero, D.H. Geschwind, L.M. Huckins, D.M. Ruderfer, E. Santiago, P. Sklar, E.A. Stahl, H. Won, E. Agerbo, T.D. Als, O.A. Andreassen, M. Baekvad-Hansen, P.B. Mortensen, C.B. Pedersen, A.D. Borglum, J. Bybjerg-Grauholm, S. Djurovic, N. Durmishi, M.G. Pedersen, V. Golimbet, J. Grove, D.M. Hougaard, M. Mattheisen, E. Molden, O. Mors, M. Nordentoft, M. Pejovic-Milovancevic, E. Sigurdsson, T. Silagadze, C.S. Hansen, K. Stefansson, H. Stefansson, S. Steinberg, S. Tosato, T. Werge, G. Consortium, C. Consortium, D.A. Collier, D. Rujescu, G. Kirov, M.J. Owen, M.C. O'Donovan, J.T.R. Walters, *Nat Genet*. **2018**, 50, 381-389.
- [8] Schizophrenia Working Group of the Psychiatric Genomics Consortium, *Nature*. **2014**, 511, 421-427.
- [9] H.J. Kang, Y.I. Kawasawa, F. Cheng, Y. Zhu, X. Xu, M. Li, A.M. Sousa, M. Pletikos, K.A. Meyer, G. Sedmak, T. Guennel, Y. Shin, M.B. Johnson, Z. Krsnik, S. Mayer, S. Fertuzinhos, S. Umlauf, S.N. Lisgo, A. Vortmeyer, D.R. Weinberger, S. Mane, T.M. Hyde, A. Huttner, M. Reimers, J.E. Kleinman, N. Sestan, *Nature*. **2011**, 478, 483-489.
